# Supplementary material for: Protrudin functions from the endoplasmic reticulum to support axon regeneration in the adult CNS
Source: Springer Nature journal article supplement (doi:10.1038/s41467-020-19436-y), 2020-11-05
Supplement: 41467_2020_19436_MOESM2_ESM.pdf [file 41467_2020_19436_MOESM2_ESM.pdf]

## REVIEWER COMMENTS

### Reviewer #1 (Remarks to the Author):

Petrova and co-workers showed a contribution of an adaptor molecule protrudin to axonal regeneration. The expression of protrudin is low in mature CNS neurons with poor regenerative capacity, and overexpression of protrudin promotes axonal regeneration after axon injury. In cultured neurons, overexpression of protrudin facilitates axonal transport of Rab11 and Integrin  $\alpha 9$ , resulting in accumulation of ER at the growth cone. Furthermore, protrudin overexpression exerts a neuroprotective effect on RGC neurons, and optic nerve injured-animals manifest improved regenerative capacity of protrudin-overexpressed axons. The authors conclude that protrudin facilitates axonal transport and ER accumulation at the growth cone and thereby promotes axonal regeneration after CNS injury.

The findings of this study are interesting and have the potential to be important in providing new therapies for CNS injuries. However, there are many questions about the explanation of the mechanism. It is likely that some of the protrudin mutants used in this study are not necessarily deficient in function as intended by the author and therefore may be misinterpreted.

### Major comments:

1. The functional characterization of "active" protrudin is totally insufficient. Although a previous study showed that protrudin mutants lacking potential ERK phosphorylation sites showed markedly reduced affinities for Rab11 compared with the affinities of wild-type protrudin (Shirane & Nakayama, *Science* 314: 818-821, 2006), the opposite is not necessarily true. As far as I know, no one has ever proven that such a phosphomimetic variant used in this study is actually an active form. The lack of verification of actual activation by the mutant protrudin is a major problem with this study. Given that various activities have been reported for protrudin, it is necessary to specify what the activity is for. For example, does active protrudin alter the ability to bind Rab11 or modify Rab11 activity? Does it increase the ability of non-neuronal cells to form protrusions? Does it differ in the promotion of endosomal transport by protrudin? These mutant sites are the phosphorylation sites of protrudin by the ERK, which is expected to be mimic, but there is no evidence that it is the same as the actual phosphorylated state.

2. Various protrudin mutants have the following problems.

- The KIF5 mutant is expected to bind neither KIF5 nor VAP, given that the FFAT domain is also deleted. In this experiment, the extent of the deletion in protrudin should be more localized so that only KIF5 does not bind to the mutant.
- TM 1-3 mutant is likely to have abnormal conformation, rather than simply not binding to the ER membrane, given the large extent of the deletion.

3. In all experiments, only overexpression of protrudin was performed and there were no inhibition of function experiments. The authors should use knockdown and knockout techniques for protrudin to show reduced accumulation of Rab11 and integrin in the growth cone, reduced accumulation of ER, and reduced neural regenerative capacity.

4. The only examples given in this study are cortical neuron and regeneration in RGC. Is it limited to these neurons, or is it a phenomenon that is widespread and universal to the neuron of CNS and PNS?

5. In this study, RTN4 is used as a marker of smooth ER. On the other hand, however, RTN4 (also known as Nogo-A) functions as a very strong inhibitor of axonal regeneration following CNS injury. The accumulation of RTN4 in the growing cone would therefore be expected to prevent the regeneration of its axons. The authors need to address this point.

6. In Figure 6, the neuroprotective effect of wild-type or active-protrudin overexpression is shown

in the whole retina explant culture. However, it is not clear that the overexpression protects cell death in RGC neurons caused by optic nerve injury. The authors should examine the effect of protrudin overexpression on the neuronal death following optic nerve injury.

7. It is very interesting that protrudin exerts two functions, neuroprotection and axon elongation, but no data are provided to show the mechanism by which wild-type or active-protrudin overexpression inhibits neuronal death induced by CNS injury. Further analysis of the neuroprotective effect of protrudin is essential to overcome the limited novelty of this study. The authors should provide a mechanism for this.

8. Fig. 1D shows that the amount of protrudin mRNA increases after peripheral nerve injury, but this is a subtle difference. The authors need to examine whether it is really elevated at the protein level.

Minor comments:

1. In Figures 1C, 1D, S2F, S3C, 5D, 6C, and 6D, the sample size is not described in the legends.

2. In Figure 1, "(G)" is mislabeled as "(D)" in the legend.

3. In Figure S2C, the letter of "E." is misplaced in the center of the figure.

4. In Figure S2E, S2F, and 4D, the vertical axis characters are not displayed properly.

5. In Figure S2E, "There were no significant differences between the four conditions" is written in the legend. Should it be "the three conditions?"

6. In Figure S3E, the scale bar is missing.

7. In Figures 3A and S4A, the length of a scale bar is not provided in the legends.

8. In Figure S5, "(B)" is missing in the legend.

9. p. 29. The reference "Farias, 2019" is not formatted properly.

Reviewer #2 (Remarks to the Author):

Petrova and colleagues have performed a series of experiments investigating the efficacy of Protrudin in promoting axon regeneration after CNS injury. Protrudin was found to be excluded from cortical axons as they mature into neuronal circuits in a time frame coinciding with their transition to an inability to regenerate. Overexpressing wildtype protrudin or a phosphomimetic active form of protein promoted axon regeneration in an in vitro laser axotomy assay and enhanced cortical axon outgrowth in vitro. Interestingly, protrudin overexpression enhanced accumulation of endoplasmic reticulum, integrins, and Rab11 endosomes into the distal axon, and importantly, removing Protrudin's endoplasmic reticulum localization, kinesin-binding, or phosphoinositide-binding properties abrogated its regenerative effects. Finally, overexpression of wildtype or active protruding prevented RGC death in a glaucoma explant model and axon regeneration after optic nerve injury in vivo.

The Fawcett lab has made substantial contributions in the field of axon regeneration, by combining state-of-the-art cell biological techniques and questions with the injured spinal cord. The presented work is another brilliant example of this approach. This study unravels the endoplasmic reticulum as a new player driving axon regeneration. The experiments provide a novel understanding of how

the scaffolding of axonal organelles and motors into the growth cone is important for regenerative outcome. The manuscript is of high technical quality and very interesting for the general readership of Nature Communications. There are few comments that should be worked on.

#### MAJOR

1. The laser axotomy assay demonstrates that overexpression of wildtype protrudin or active protrudin enhances axon regeneration in mature neurons. Is there a specific time-frame post-axotomy in which Protrudin enhances outgrowth? Does it enhance initial growth cone formation or growth after growth cone formation has already occurred? The authors should compare the kinetics of axon growth in regenerating axons between the different groups and assess this with their existing data.

2. The effect of Protrudin overexpression on neuroprotection in the glaucoma model presented in Figure 6 is very exciting. It would be of significant interest to the community to assess whether Protrudin overexpression can also prevent cell loss after axotomy in vivo. Conversely, it would be interesting to know if Protrudin overexpression prevents neurodegeneration in the explant model but not in the in vivo situation, and if this were the case, it would not change the importance of this paper. Given the experiments performed in Figure 5, the authors should perform retinal whole-mount staining or stain tissue sections of the retina and quantify the extent of retinal ganglion cell loss 2 weeks after optic-nerve crush after overexpression of the wildtype protrudin and active protrudin constructs relative to control.

The reviewer is aware of the current Covid-situation. In case this is the only hurdle preventing rapid publication, the reviewer can be convinced that this should not be done. If, however, other reviewers ask for experimental additions, preventing a rapid turnaround, we would like to kindly ask that this experiment will be performed.

#### MINOR –

-In introduction – “leading to better regenerative after injury” should be “better regeneration”

-Later in introduction – “Interfering with other key domains of also eliminated the regenerative effects.” – missing Protrudin?

-The figure legend for Figure 1 is missing “G”. It is not clear at what timepoint DIV the analysis of the overexpressed Protrudin is done at.

-The discussion is quite long and should be re-written to be more concise.

Reviewer #3 (Remarks to the Author):

Comments to Authors:

In this study, Petrova and colleagues have utilized imaging techniques to study effects of overexpression of the ER protein protrudin in axonal regeneration. The main finding from the work is that protrudin, especially in its phosphorylated form, is able to promote axon regeneration and it requires all of its membrane targeting and protein binding domains to be able to perform this function, suggesting that this process requires the scaffolding of kinesin, Rab11 vesicles and the endoplasmic reticulum (ER). Similar findings have been reported for a role of protrudin in neurite outgrowth, but this manuscript is the first report in the context of axonal regeneration. Increasing the flux of Rab11 vesicles in axons has been previously shown to promote axonal regeneration, so given that the authors show that protrudin overexpression promotes Rab11 vesicle trafficking in axons, it is expected that protrudin would be able to promote axonal regeneration as well. The most original finding from this manuscript is the requirement of the ER localization of protrudin in

the process. This result will open new questions regarding the role of the ER in axonal regeneration. A main limitation of this study is that it is not clear how the various interactions of protrudin are functionally interconnected. This limitation limit the conceptual advance contributed by this manuscript relative to previous knowledge.

Specific comments:

- In several experiments, a phosphomimetic form of protrudin is used. The study cited regarding this construct (Shirane et al 2006) finds that protrudin gets phosphorylated upon ERK activation, that protrudin binds better to Rab11 upon ERK activation, and identifies potential ERK phosphorylation sites in protrudin. However, this study does not directly test whether phosphomimetic mutants of protrudin indeed recruit more Rab11 than WT forms of the protein. The authors should analyse whether in fact there is more Rab11 bound to the active form of protrudin when compared to WT, and whether other properties of Protrudin (such as kinesin binding or VAP binding) are affected in this mutant.
- It was shown previously that overexpression of Rab11 promotes axonal regeneration by increasing Rab11 trafficking into the axon, and the present manuscript shows that protrudin overexpression increases Rab11 trafficking in the axon. However, the authors here report that the ER connection of protrudin is also crucial for axonal regeneration, suggesting its role in tethering Rab11 to KIF5A is not enough to achieve a considerable effect in this process. Could these effects be intertwined? Is Rab11 trafficking into the axon affected by overexpression of the ER-localization defective mutants?
- In Fig 4E, the graph suggests that both protrudin mutants defective in ER binding (the construct lacking the motif FFAT and the construct lacking TM domains) are not as powerful in promoting axon regeneration as the active form of protrudin, although these mutants have some effect relative to the control. Given that these mutants can still bind kinesin and Rab11, one wonders whether the effect of protrudin in axonal regeneration is the result of these effects, independently, the ER into the growing axon. Would it be possible to promote the regeneration of axons with co-expression of a protrudin construct that can bind VAP and KIF5A but not Rab11 and a protrudin construct that can bind Rab11 and KIF5a but not VAP? In other words, is it strictly necessary to have a scaffold of the 3 components (ER, Rab11 and kinesin) or is protrudin performing two separate jobs by separately linking the ER to kinesin and Rab11 to kinesin?

Minor comments:

- Some measurements of mRNA in Fig1D do not have error bars. These are necessary to support the claim that protrudin expression is increased upon injury.

30 Reviewer #1 (Remarks to the Author):

31 *Petrova and co-workers showed a contribution of an adaptor molecule protrudin to axonal*  
32 *regeneration. The expression of protrudin is low in mature CNS neurons with poor*  
33 *regenerative capacity, and overexpression of protrudin promotes axonal regeneration after*  
34 *axon injury. In cultured neurons, overexpression of protrudin facilitates axonal transport of*  
35 *Rab11 and Integrin  $\alpha 9$ , resulting in accumulation of ER at the growth cone. Furthermore,*  
36 *protrudin overexpression exerts a neuroprotective effect on RGC neurons, and optic nerve*  
37 *injured-animals manifest improved regenerative capacity of protrudin-overexpressed axons.*  
38 *The authors conclude that protrudin facilitates axonal transport and ER accumulation at the*  
39 *growth cone and thereby promotes axonal regeneration after CNS injury.*

40

41 *The findings of this study are interesting and have the potential to be important in providing*  
42 *new therapies for CNS injuries. However, there are many questions about the explanation of*  
43 *the mechanism. It is likely that some of the protrudin mutants used in this study are not*  
44 *necessarily deficient in function as intended by the author and therefore may be misinterpreted.*

45

46 *Major comments:*

47

48 *1. The functional characterization of “active” protrudin is totally insufficient. Although a*  
49 *previous study showed that protrudin mutants lacking potential ERK phosphorylation sites*  
50 *showed markedly reduced affinities for Rab11 compared with the affinities of wild-type*  
51 *protrudin (Shirane & Nakayama, Science 314: 818-821, 2006), the opposite is not necessarily*  
52 *true. As far as I know, no one has ever proven that such a phosphomimetic variant used in this*  
53 *study is actually an active form. The lack of verification of actual activation by the mutant*  
54 *protrudin is a major problem with this study. Given that various activities have been reported*  
55 *for protrudin, it is necessary to specify what the activity is for. For example, does active*  
56 *protrudin alter the ability to bind Rab11 or modify Rab11 activity? Does it increase the ability*  
57 *of non-neuronal cells to form protrusions? Does it differ in the promotion of endosomal*  
58 *transport by protrudin? These mutant sites are the phosphorylation sites of protrudin by the*  
59 *ERK, which is expected to be mimic, but there is no evidence that it is the same as the actual*  
60 *phosphorylated state.*

61 The reviewer raises several important points: is there evidence that phosphomimetic Protrudin  
62 has additional activity, and do we understand the mechanism? Our approach was to target  
63 Protrudin phosphorylation sites known to be phosphorylated by ERK. We, therefore, created a  
64 phosphomimetic form of the protein by mutating specific serine and threonine residues to  
65 aspartic acid, which is the most widely accepted approach to generate phosphomimic proteins  
66 <sup>1</sup>. Our intention was not to copy the actions of ERK, but to investigate whether mimicking  
67 phosphorylation at these sites would have favourable effects for our study. There is data in the  
68 submitted paper that demonstrates that the phosphomimetic Protrudin has additional effects to  
69 the native molecule, and we have performed several additional experiments to assess whether  
70 phosphorylated Protrudin is in fact “active”.

71 Below, we respond to each question by the reviewer covering the following effects of  
72 phosphomimetic and wild-type Protrudin on:

73 **1) Rab11 binding;** The reviewer asks whether the greater efficacy of phosphomimetic  
74 Protrudin might be due to increased Rab11 binding, because one of the sites that was  
75 mutated is usually called the Rab11-binding site. We have performed an additional set  
76 of experiments that address this point described as follow:

77

78 - **Co-immunoprecipitation;** We performed co-immunoprecipitation analysis in  
79 HeLa cells co-transfected with either control GFP, wild-type or phosphorylated  
80 Protrudin-GFP together with either wild-type, dominant negative (DN, GDP-  
81 bound) or constitutively active (CA, GTP-bound) Rab11-RFP in order to assess  
82 whether there is altered Rab11-binding upon mutant Protrudin overexpression, but  
83 our findings were inconclusive (Fig. R1A-B). All co-immunoprecipitation  
84 experiments were conducted in accordance with published protocols and previous  
85 findings in Shirane and Nakayama, 2006 <sup>2</sup> and we have performed at least 3  
86 individual experiments in each condition. We found that both wild-type and  
87 phospho-Protrudin bound to all forms of Rab11 compared to GFP control. There  
88 was a trend for less binding of active Protrudin to wild-type Rab11, for increased  
89 binding of active Protrudin to constitutively active Rab11 compared to wild-type  
90 Protrudin, but there were no differences in binding to dominant negative Rab11.  
91 Overall, we did not observe any statistically significant changes across any of the  
92 conditions (Fig. R1C).

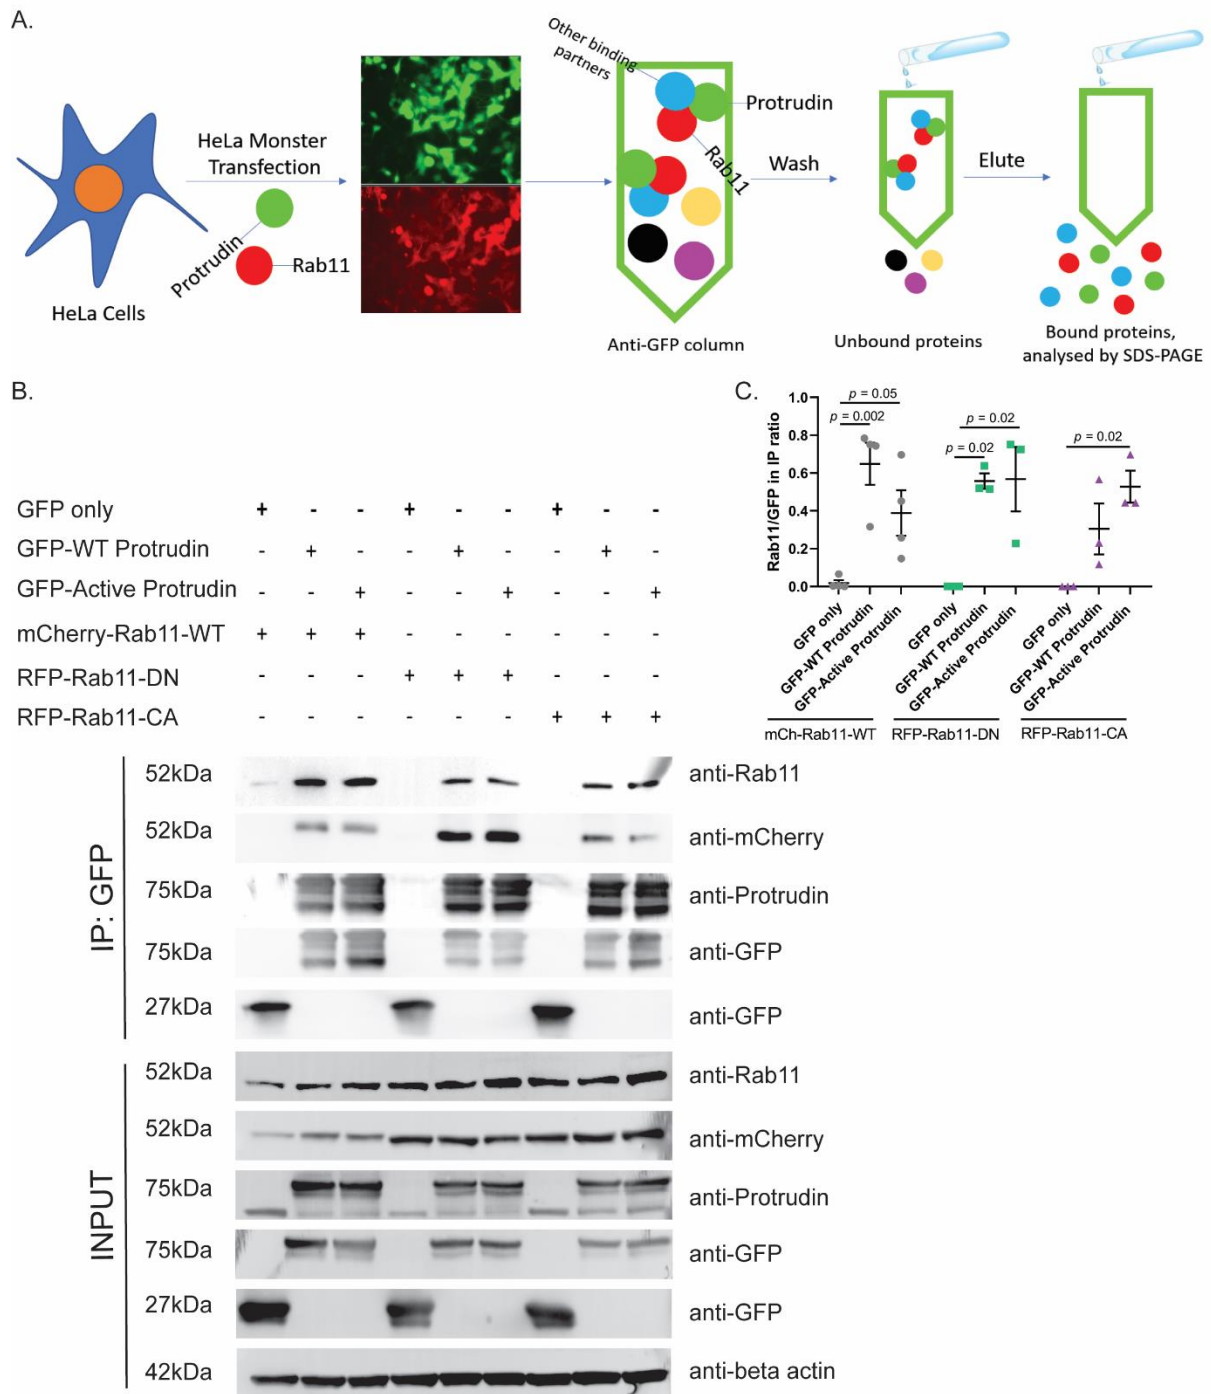

93

94 **Fig. R1. Co-Immunoprecipitation of Protrudin and Rab11.** A. A schematic diagram to  
 95 describe the co-immunoprecipitation methodology. B. Immunoblots from IP and input to show  
 96 that wild-type and also constitutively phosphorylated Protrudin bind to all forms of Rab11.  
 97 GFP on its own, does not bind to any forms of Rab11. C. Quantification of the band density of  
 98 Rab11 in IP after immunoblotting with anti-Rab11 antibody from several different experiments  
 99 ( $n = 3-4$ ), normalised to the amount of GFP overexpression (*one-way ANOVA*,  $p = 0.004$  for

100 WT Rab11,  $p = 0.01$  for DN Rab11 and  $p = 0.02$  for CA Rab11). There were no differences  
101 observed between the binding of wild-type and mutant Protrudin to any one form of Rab11.

102



103 - **Rab11 Live-cell imaging;** We also looked at Protrudin-Rab11 interactions in  
104 cortical neurons using live cell imaging. These experiments are in Figure 3 of our  
105 manuscript and show that either wild-type or active Protrudin overexpression  
106 results in an increased amount of Rab11 vesicles in distal axons, however there was  
107 no difference between expression of wild-type or active Protrudin. We did not find  
108 any difference between wild-type and phosphomimetic Protrudin in their effects on  
109 the directionality of Rab11 endosomal transport. We have now addressed this in the  
110 manuscript by adding the sentence “The finding that active Protrudin has no  
111 additional effect on axonal transport compared with wild-type Protrudin suggests  
112 that phospho-mimetic Protrudin does not function to further stimulate Rab11  
113 transport” on pages 13 and 14.

114  
115

116 2) **Non-neuronal cell line protrusion formation;** As suggested by the reviewer, we  
117 performed experiments to look at protrusion formation in HeLa cells in accordance with  
118 previous findings by Shirane and Nakayama, 2006. We included the data generated  
119 from this experiment as a supplementary figure in the manuscript. We found that  
120 expression of the phosphomimetic Protrudin mutant resulted in a higher percentage of  
121 cells forming protrusions as well as in longer protrusions compared to wild-type  
122 Protrudin, confirming the “active” phenotype of the mutant. This data is now presented  
123 in Fig. S1 and is described in the text on page 4.

124

125 3) **Endosomal Transport;** As mentioned above we performed live-cell imaging  
126 experiments to assess the role of active Protrudin on endosomal vesicle transport. To  
127 do this we co-expressed either wild-type or active Protrudin together with one of two  
128 endosome markers which we have successfully used in the past – Rab11 and integrin  
129 alpha 9. We observed an increase in endosomal trafficking in the distal axon, but we  
130 did not observe any significant changes between wild-type and active Protrudin. All  
131 data is presented in Figure 3.

132 In our study, we found the most pronounced effects of the phosphomimetic Protrudin over the  
133 wild-type protein on:

134 1) **Axotomy;** Phosphomimetic Protrudin has a greater ability to promote axon  
135 regeneration *in vivo* compared to wild-type and there is a similar trend *in vitro*. This is  
136 shown in Figures 2 and 5.

137 2) **ER localisation;** Phosphomimetic Protrudin recruits ER to growth cones more  
138 effectively than wild-type Protrudin, shown in Figure 4. We have now used an additional  
139 marker to localize ER which confirms the result, shown in our response to point 4. This  
140 is shown in Fig. S6 and described on page 17-18. We have now added the sentence  
141 “These findings indicate that phosphomimetic, active Protrudin has stronger effect on  
142 ER mobilisation compared to wild-type Protrudin, in contrast to its effect on Rab11  
143 transport (Fig. 3)” to the text on page 18. We also observed increased ER labelling  
144 (RTN4) in the protrusions of HeLa cells expressing active Protrudin, but not wild-type  
145 Protrudin. This is in supplementary figure S1D, and is described in the text on page 17:  
146 “We observed a similar accumulation of ER at the tip of protrusions in HeLa cells  
147 expressing active but not wild-type Protrudin (**Fig. S1D**).” This is also discussed in the  
148 response to points raised by reviewer #3, and may be occurring through an increased  
149 interaction with VAP proteins (please see below).

150  
151 3) **Neuroprotection;** We have performed a new experiment looking at neuroprotection 2  
152 weeks after optic nerve crush which shows that phosphomimetic Protrudin is more  
153 effective at preserving retinal ganglion cells than the wild-type protein. This data is now  
154 included in Figure 5, and is described in the text on page 22.

155 Overall, we have shown that phosphomimetic Protrudin has greater effects on axon  
156 regeneration and neuroprotection than the wild-type protein. However, we do not have  
157 evidence that phosphomimetic Protrudin binds more strongly to Rab11. Our results therefore  
158 do not support the possibility that the stronger effect of phosphomimetic Protrudin on  
159 regeneration and protection is via enhanced Rab11 association. An effect via the endoplasmic  
160 reticulum is more probable from our results. We have used the term “active Protrudin” for the  
161 phosphomimetic form in order to aid comprehension and in accordance with our protrusion  
162 formation results in HeLa cells, but we could change this term to phosphomimetic Protrudin if  
163 the reviewers feel strongly.

164 2. *Various protrudin mutants have the following problems.*

165 - *The KIF5 mutant is expected to bind neither KIF5 nor VAP, given that the FFAT domain is*

166 *also deleted. In this experiment, the extent of the deletion in protrudin should be more*  
167 *localized so that only KIF5 does not bind to the mutant.*

168 *- TM 1-3mutant is likely to have abnormal conformation, rather than simply not binding to the*  
169 *ER membrane, given the large extent of the deletion.*

170 The reviewer makes an important point about the KIF5 mutant used in this paper – the large  
171 deletion does indeed encompass both the CC domain as well as the FFAT domain which is  
172 important for VAP-A binding. We chose to use this mutant rather than the specific CC domain  
173 mutant because of the 2011 paper by Matsuzaki *et al.*, which meticulously dissected the  
174 interaction domains of Protrudin and various key binding proteins. This indicates that there is  
175 also binding between VAP-A and KIF5, and that the dual FFAT / CC domain mutant prevented  
176 interaction with KIF5<sup>3</sup>. We used this dual mutant to robustly prevent the KIF5 interaction.

177 In order to achieve a more specific ablation of the interaction between Protrudin and KIF5, we  
178 have also created a mutant in which only the coil-coiled domain ( $\Delta$ CC) is deleted as suggested  
179 by the reviewer. This mutant has previously been validated and shown to disrupt the interaction  
180 between Protrudin and KIF5<sup>3</sup>. We intended to test the effect of this mutant on regeneration in  
181 axotomised rat primary neurons. Unfortunately, we were unable to obtain animal embryos due  
182 to COVID-related disruption of our animal facility and this disruption will likely be ongoing  
183 for several months. In order to address the reviewer's comments, we have changed the text  
184 throughout our manuscript addressing the fact that this mutant also includes an FFAT domain  
185 deletion.

186 We added the following text on page 14: “We also created a mutant which lacked the FFAT  
187 (important for VAPA binding at ER contact sites) and the coiled-coil domain which has  
188 previously been shown to disrupt the interaction of Protrudin with the anterograde axonal motor  
189 KIF5<sup>26</sup>. We termed this mutant KIF5/VAPA mutant.” In addition, we added the following  
190 explanation on page 18: “We showed above that a combined KIF5/VAPA mutant which  
191 disrupts binding to KIF5 reduced the regenerative effect of active Protrudin (Fig. 3F).  
192 Interestingly, disruption of the FFAT domain alone had a similar effect on suppressing axon  
193 regeneration to the combined KIF5/VAPA deletion mutant, underlying the importance of  
194 Protrudin's interaction with ER contact site protein VAPA to mediate axon regeneration. These  
195 data demonstrate that Protrudin enables the enrichment of ER in axon growth cones, and that  
196 this supports Protrudin's regenerative effects.”

197 We made the TM1-3 mutant because of previous work that robustly validated its properties in  
198 Chang *et al.*, 2013<sup>4</sup>. In this study, the authors show that there were no changes in Protrudin's  
199 binding capacity when the TM1-3 domain is deleted compared to wild-type Protrudin. They  
200 also showed that TM1-3 unlike individual transmembrane mutations (TM1-2, TM3, etc.) is  
201 dispersed in the cytoplasm and loses its ER tubular localisation. In subcellular fractionation,  
202 the TM1-3 is found in the soluble fraction whereas wild-type Protrudin appears in the  
203 membrane fraction. These results suggest that the TM1-3 domains are important for Protrudin  
204 localisation within the endoplasmic reticulum but do not impede its ability to oligomerise. In  
205 addition, wild-type but not TM1-3 Protrudin could rescue ER tubular defects induced by  
206 Protrudin depletion in HeLa cells. The TM1-3 mutant has therefore been previously extensively  
207 validated and it was shown to lose its ER localisation properties without causing abnormal  
208 protein conformation. This paper is cited in the relevant section on page 17. Cells transfected  
209 with the TM1-3 Protrudin mutant in our study also exhibited no abnormal Protrudin  
210 aggregation and the protein showed diffuse, cytoplasmic localisation as expected.

211

212 *3. In all experiments, only overexpression of protrudin was performed and there were no*  
213 *inhibition of function experiments. The authors should use knockdown and knockout techniques*  
214 *for protrudin to show reduced accumulation of Rab11 and integrin in the growth cone, reduced*  
215 *accumulation of ER, and reduced neural regenerative capacity.*

216 It would certainly be useful to know whether the very small amount of endogenous Protrudin  
217 in CNS neurons has a function. We have performed many experiments in pursuit of this. Below  
218 we present data to show that expression of shRNA constructs targeting Protrudin lead to a  
219 reduction in regenerative ability. However, we have not been able to validate Protrudin  
220 silencing reliably in cortical neurons, using either shRNA or CRISPR approaches, so we cannot  
221 make reliable conclusions from our data.

222 Currently, there are no commercially available animal models of Protrudin knockout.  
223 Previously, successful knockdown of Protrudin was performed using siRNA constructs in  
224 RPE-1 cells (human retinal pigmented epithelial cells) and in HEK293 (from human embryonic  
225 kidney) after 48 hours<sup>5</sup> as well as in HeLa and PC12 cells<sup>2,6</sup>. Protrudin has also been  
226 previously knocked down in zebrafish using morpholinos and this resulted in developmental  
227 impairments<sup>7</sup>. Knockdown of endogenous rat Protrudin in rat primary neurons has not been

228 documented so far. Here, we used two approaches to reduce Protrudin levels in primary rat  
229 cortical neurons *in vitro* – commercially available shRNA against rat Protrudin as well as  
230 custom-made sgRNA for CRISPR-Cas9 knockdown (Fig. R2 below).

231 We used rat primary cortical neurons transfected with 4 shRNA constructs or a combination of  
232 all four (shRNA\_A, shRNA\_B, shRNA\_C and shRNA\_D from OriGene) to test the ability of  
233 these shRNAs to silence endogenous Protrudin. In primary cortical neurons transfection rates  
234 are low, so to detect lowering of Protrudin by shRNA we had to rely on antibody staining.  
235 Comparing transfected and non-transfected cells, no significant changes were observed in the  
236 expression of the Protrudin protein with any of the shRNA constructs. However, the Protrudin  
237 level in these neurons is so low that staining is very close to the background level. The antibody  
238 works, because in Protrudin-transfected neurons staining is very bright (Fig. S2 in the  
239 manuscript). Although we could not document knockdown, we performed laser axotomies in  
240 neurons expressing either scrambled, or shRNA\_A or shRNA\_D and very low regeneration  
241 rates, lower than in control or scrambled shRNA neurons were observed.

242 We also performed a CRISPR experiment. Two different rat-specific sgRNA sequences  
243 (CRISPR\_1 and CRISPR\_3), targeting different regions of the Protrudin gene, were designed.  
244 A non-targeting RNA (nsgCRISPR) was used as a control. We transfected primary cortical  
245 neurons either at 3 DIV or at 10 DIV and neurons were fixed at 15 DIV and stained for HA-  
246 tag to detect the CRISPR-Cas9 construct and with antibodies for the Protrudin protein. By  
247 twelve days after transfection, a small proportion of cells expressing CRISPR\_1 and  
248 CRISPR\_3 constructs showed no or very little Protrudin immunostaining staining (between 0-  
249 25% compared to control levels). The rest of the cells, however, had similar amount of  
250 Protrudin compared to the two controls. Again, we could not obtain a reliable verification that  
251 we had reduced the already very low Protrudin level. In the absence of confirmed silencing we  
252 decided not to include this data in our paper.

253 The message of our manuscript is that Protrudin overexpression is a useful approach to  
254 promoting axon regeneration, and our experimental data provide a new understanding of distal  
255 axon organelles as important for regenerative success. Whilst we agree that it will be important  
256 to define the endogenous role of Protrudin, and this is something we will continue to  
257 investigate, we do not feel that this is necessarily within the scope of our current manuscript.

258

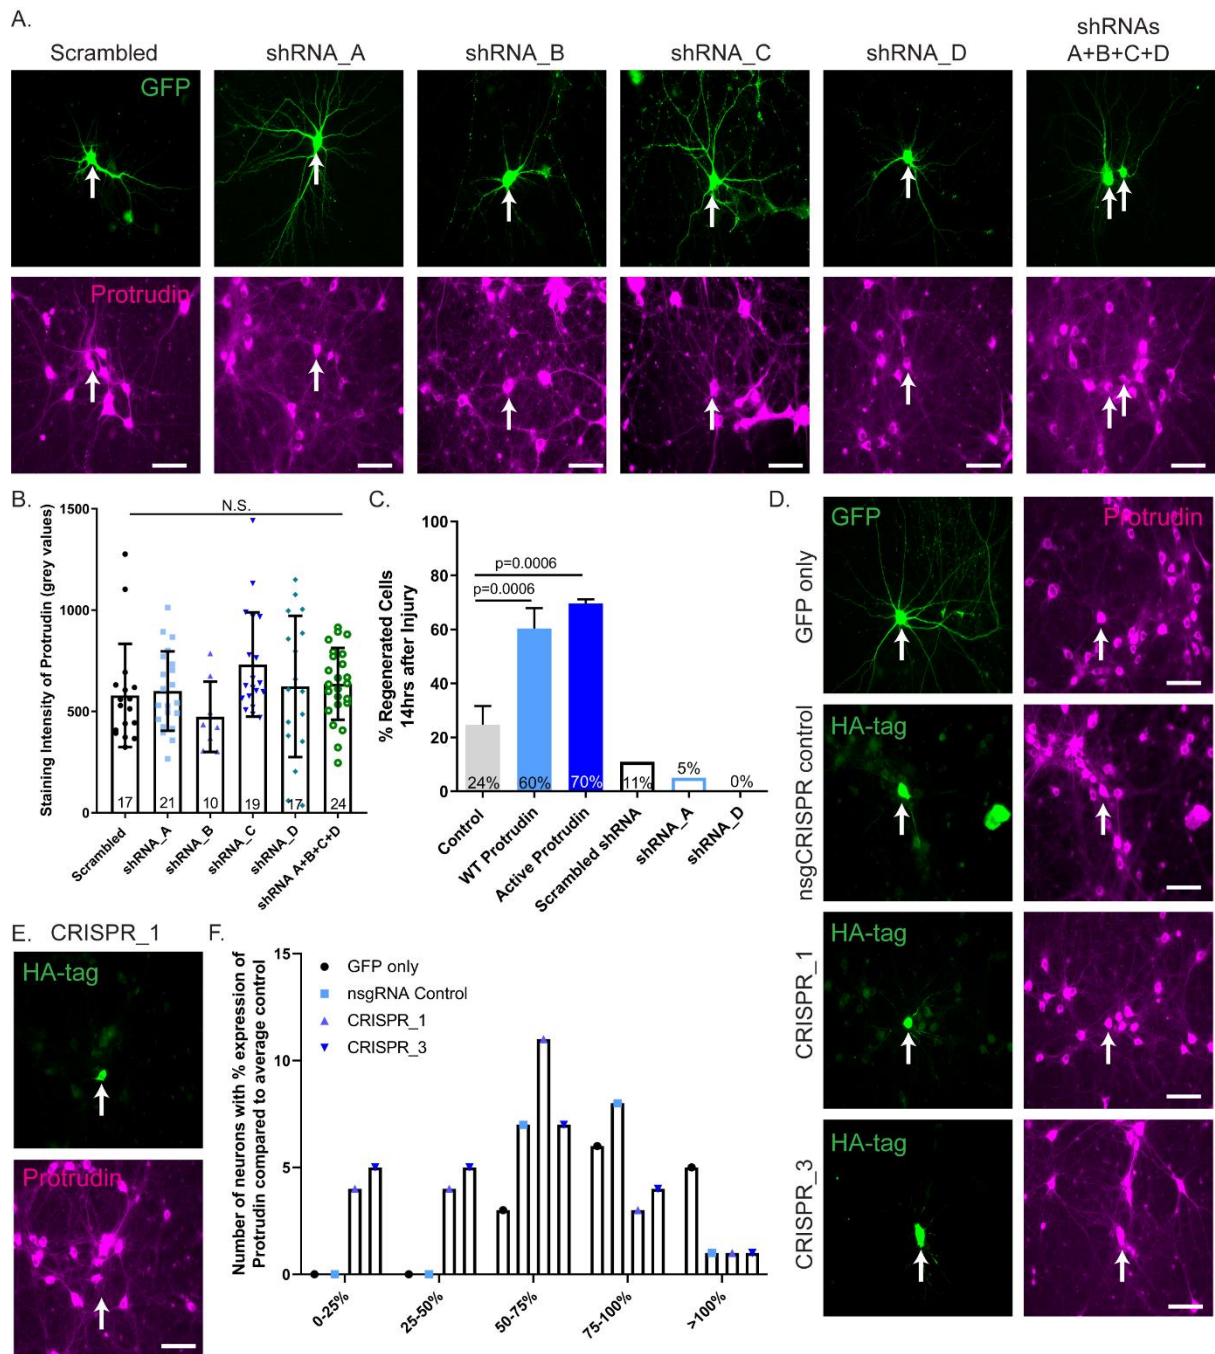

259

260 **Fig. R2** shRNA and CRISPR constructs against rat Protrudin do not result in reliable  
 261 Protrudin knockdown in rat primary cortical neurons. A. Immunofluorescence images of  
 262 primary cortical neurons expressing each construct. Images are taken at 40x. Scale bars are 20  
 263  $\mu$ m. B. Bar graph to show that no significant changes were observed in protrudin staining  
 264 intensity when overexpressing each construct ( $p=0.101$ , Kruskal-Wallis statistic=9.182,  $n=2$ ).  
 265 C. Bar graph to show the percentage of regenerating axons after laser axotomy of neurons  
 266 overexpression scrambled control and 2 shRNAs - shRNA\_A and shRNA\_D. D.

267 Immunofluorescence images of primary cortical neurons expressing GFP alone, nsgCRISPR  
268 control, CRISPR\_1 or CRISPR\_3 (green) and stained for protrudin (red). Images are taken at  
269 40x. Scale bars are 20  $\mu\text{m}$ . E. Example images of a cell transfected with CRISPR\_1 which  
270 shows complete knockdown as there is no Protrudin staining. Images were taken at 40x. Scale  
271 bars are 20  $\mu\text{m}$ . Bar graph to show the percentage of Protrudin in rat cortical neurons  
272 overexpressing each construct compared to the average intensity of Protrudin staining in GFP-  
273 expressing neurons and the distribution of those. Error bars represent  $\pm$  SEM.

274

275 *4. The only examples given in this study are cortical neuron and regeneration in RGC. Is it*  
276 *limited to these neurons, or is it a phenomenon that is widespread and universal to the*  
277 *neuron of CNS and PNS?*

278 We thank the reviewer for this comment. At present we have examined Protrudin's effects in  
279 two types of CNS neurons, cortical and retinal ganglion cell neurons. Endogenous and  
280 overexpressed Protrudin's role in axon regeneration in other types of CNS neuron and in the  
281 PNS are certainly of great interest to explore. In our study, we specifically set out to improve  
282 the growth and regenerative potential in CNS neurons which normally have low intrinsic  
283 regenerative abilities.

284 In order to assess the involvement of Protrudin in the robust regenerative response seen in the  
285 peripheral nervous system, we believe the best approach will be to ablate Protrudin's  
286 expression and observe any changes in the regenerative process. As mentioned in our response  
287 to point 3 above, currently there are no available animal models of Protrudin knockdown, and  
288 we have been unable to make reliable knockdowns. In future work it will be interesting to  
289 follow this question, but it is outside the range of the current study. We mention mRNA levels  
290 in sensory neurons in the paper for interest, but we can remove this data if it is confusing and  
291 incomplete. We have removed the following reference to the PNS in the discussion section  
292 previously found on page 26 in order to focus on our CNS findings: "Protrudin mRNA is  
293 expressed at low levels in cultured CNS cortical neurons compared to other abundantly  
294 expressed proteins but is found at much higher levels in sensory neurons (**Fig. 1C-D**).  
295 Interestingly, Protrudin's pattern of expression in the developing mouse embryo as well as in  
296 cultured DRG neurons and after peripheral lesions contrasts with that of Cacna2d2 – a calcium  
297 channel protein which when suppressed improves axon regeneration (**Fig. 1D**)<sup>27</sup>. Protrudin's  
298 upregulation after peripheral nerve lesion suggested pro-regenerative properties."

299

300 *5. In this study, RTN4 is used as a marker of smooth ER. On the other hand, however, RTN4*  
301 *(also known as Nogo-A) functions as a very strong inhibitor of axonal regeneration following*  
302 *CNS injury. The accumulation of RTN4 in the growing cone would therefore be expected to*  
303 *prevent the regeneration of its axons. The authors need to address this point.*

304



305 This is an excellent point, Reticulon-4 (RTN4), also known as Nogo-A, on oligodendrocytes  
306 is indeed a well-proven inhibitor of axon regeneration. However, RTN4 expressed in neurons  
307 incorporates into the endoplasmic reticulum (ER), and this endogenous RTN4 promotes growth  
308 and regeneration in the CNS <sup>8,9</sup>, and is present in regenerating PNS axons after sciatic nerve  
309 injury <sup>10</sup>. Physiologically, RTN4 and all reticulon proteins function to stabilise the shape and  
310 structure of the endoplasmic reticulum <sup>11,12</sup>. Recent studies demonstrated that endogenous  
311 RTN4 acts to generate and maintain the shape and the structure of ER tubules and either  
312 overexpression or deletion of the protein resulted in misshapen and not functional ER <sup>12</sup>. In the  
313 same study, the authors were only able to detect RTN4 in association with the ER inside the  
314 cell and not at the plasma membrane in primary neurons <sup>12</sup>.

315

316 In our study RTN4 was not overexpressed. In our rat primary cortical neurons, RTN4 was used  
317 as a tubular ER marker in accordance with recently published literature <sup>13</sup>. We used  
318 immunostaining for endogenous RTN4 rather than overexpression of the tagged protein as  
319 described in the manuscript. This was obviously not sufficiently clear, so we have now  
320 modified the results section on page 17 and stated: “To examine the effects of Protrudin  
321 overexpression on axonal ER we analyzed the distribution of endogenous reticulon 4 (RTN4)  
322 by immunofluorescence, which reports on ER abundance in axons <sup>13</sup>.”

323

324 In addition, to add a further validation of the change in distribution of ER after Protrudin  
325 overexpression, we overexpressed REEP5-GFP in combination with either mCherry control,  
326 wild-type or active Protrudin and measured the amount of REEP5 in growth cones in each  
327 condition. Our results showed that overexpression of either wild-type or active Protrudin  
328 resulted in increased amount of REEP5 at the axon tip compared to control, with a trend of  
329 more REEP5 with active Protrudin overexpression compared to control. This data is now  
330 Figure S6, and the associated text is on page 18.

331

332

333 *6. In Figure 6, the neuroprotective effect of wild-type or active-protrudin overexpression is*  
334 *shown in the whole retina explant culture. However, it is not clear that the overexpression*  
335 *protects cell death in RGC neurons caused by optic nerve injury. The authors should examine*  
336 *the effect of protrudin overexpression on the neuronal death following optic nerve injury.*

337 We thank the reviewer for this suggestion, and we agree that it is of great importance to show  
338 whether Protrudin provides neuroprotection at a longer time point after optic nerve injury.  
339 We have now done this experiment and confirmed that phosphomimetic Protrudin is strongly  
340 neuroprotective after optic nerve crush.

341 The whole retina explant model showed in Fig. 6 of the original manuscript represents a model  
342 of complete axonal transection of retinal ganglion axons as the retina is excised from the eye  
343 and placed in an ex vivo culture system. Therefore, this model is analogous to optic nerve  
344 axotomy as described in Pattamatta *et al.*, 2016<sup>14</sup>. In this model, approximately 50% cell death  
345 of retinal ganglion cells is observed 3 days post axotomy which makes it a reliable model for  
346 the identification of neuroprotective treatments. Nevertheless, we understand the limitation of  
347 measuring neuroprotection only 3 days post axotomy.

348 To address this issue, we performed optic nerve crush as described in the manuscript on page  
349 19 and calculated the survival rate of retinal ganglion cells as identified by RBPMS staining 2  
350 weeks post injury. We found that active Protrudin increased the proportion of surviving retinal  
351 ganglion cells (52%) compared to either wild-type (27%) or control (28%) suggesting that  
352 active Protrudin has a long-lasting neuroprotective effect. This new data is included in Fig. 5C  
353 and D and is described in the text on page 22. Additional methods have also been added on  
354 page 41.

355

356 *7. It is very interesting that protrudin exerts two functions, neuroprotection and axon*  
357 *elongation, but no data are provided to show the mechanism by which wild-type or active-*  
358 *protrudin overexpression inhibits neuronal death induced by CNS injury. Further analysis of*  
359 *the neuroprotective effect of protrudin is essential to overcome the limited novelty of this study.*  
360 *The authors should provide a mechanism for this.*

361 We thank the reviewer for the excellent point – we are currently applying for funding to study  
362 the mechanisms of Protrudin overexpression on neuroprotection. This project involves  
363 extensive analysis in order to pinpoint the exact actions of Protrudin in the axon, at the growth  
364 cone and in the cell body, as well as its influences on intracellular signalling pathways and  
365 survival mechanisms. These studies are, however, very extensive and we believe out of the  
366 scope of the current study.

367 In order to address some of the possible neuroprotective mechanism of Protrudin's action, we  
368 have briefly discussed here some of the possible mechanisms and if the reviewer thinks this  
369 greatly contributes to the depth of our paper, we can add this paragraph to our Discussion.

370 There are several mechanisms by which Protrudin can promote neuroprotection. The most  
371 plausible mechanism is that overexpression of Protrudin results in improved axonal transport  
372 of growth-promoting receptors such as TrkB, integrins, PI3K etc. Once those receptors are  
373 transported and inserted to the growth cone, they initiate a whole myriad of intracellular  
374 signalling cascades. These, in turn result in variety of events which can contribute to  
375 neuroprotection such as the initiation of retrograde survival signals to the soma resulting in  
376 altered genetic and epigenetic regulation, alteration of the activation state of specific motor  
377 proteins which in turn potentiates these effects, post-translational modifications as well as  
378 altered transport of organelles essential for survival after injury such as the mitochondria. In  
379 addition, protrudin has been associated with the shaping and proper function of the  
380 endoplasmic reticulum – proper calcium homeostasis in the ER is essential for survival after  
381 injury so one possibility is that protrudin contributes to neuroprotection by redistributing ER  
382 along the injured axon.

383

384 *8. Fig. 1D shows that the amount of protrudin mRNA increases after peripheral nerve injury,*  
385 *but this is a subtle difference. The authors need to examine whether it is really elevated at the*  
386 *protein level.*

387

388 We thank the reviewer for the great suggestion. The data we presented in Fig.1D which shows  
389 mRNA expression data during development and after peripheral nerve injury is already  
390 published data which is freely available<sup>15</sup> – we did not perform peripheral nerve injury  
391 experiments in this paper. To address this question, we searched the literature available on  
392 proteomic studies after peripheral nerve injury and we were only able to find one peer-reviewed  
393 paper so far.<sup>16</sup> This study, however, focuses on using the spared nerve injury (SNI) model to  
394 induce neuropathic pain rather than observing regenerative response. Protrudin was not  
395 detected as one of the peripheral nerve or spinal cord enriched proteins in this study. Currently,  
396 some of our collaborators at Boston Children's Hospital, Harvard University are working to  
397 create a comprehensive proteomic analysis of peripheral nerve and DRGs after several different

398 types of peripheral injury, where regeneration is either extensive or sparse. This study is  
399 however, temporarily stalled due to the global COVID-19 pandemic and we look forward to  
400 studying Protrudin protein changes in these datasets once they become available. We will not  
401 have access to the data requested until the experiments described above are completed, peer-  
402 reviewed and published.

403 The dorsal root ganglion data was put in the paper for general interest. It is not our data, not  
404 essential for the paper, and if the reviewer thinks that it is incomplete and confusing, it is  
405 probably best to remove it. We have already removed mention of this data from the start of the  
406 discussion section which previously read “Interestingly, Protrudin’s pattern of expression in  
407 the developing mouse embryo as well as in cultured DRG neurons and after peripheral lesions  
408 contrasts with that of Cacna2d2 – a calcium channel protein which when suppressed improves  
409 axon regeneration (**Fig. 1D**)”.

410

411 *Minor Comments:*

412 1. *In Figures 1C, 1D, S2F, S3C, 5D, 6C, and 6D, the sample size is not described in the*  
413 *legends.*

414 All sample sizes have been added in the legends and highlighted for Fig. 1C-D (page 8),  
415 for Fig. S2F (now renamed to Fig. S3F on page 5 of the Supplementary material), Fig.  
416 S3C (now renamed to Fig. S4C on page 7 of Supplementary), Fig. 5D (now moved to  
417 Supplementary material in Fig. S7B on page 11 of the Supplementary) and Fig. 6C-D  
418 (pages 27-28).

419 2. *In Figure 1, “(G)” is mislabeled as “(D)” in the legend.*

420 The change has been highlighted in the manuscript on page 8.

421 3. *In Figure S2C, the letter of “E.” is misplaced in the center of the figure.*

422 The change has been made in Fig. S2C. Figure S2 is now moved and renamed to Figure  
423 S3 on page 5 of the Supplementary material.

424 4. *In Figure S2E, S2F, and 4D, the vertical axis characters are not displayed properly.*

425 The changes have been made in the respective figures. Fig. S2 is now moved and  
426 renamed to Figure S3 on page 5 of the Supplementary material. Fig. 4D is on pages 20-  
427 21.

428 5. *In Figure S2E, “There were no significant differences between the four conditions” is*  
429 *written in the legend. Should it be “the three conditions?”*

430 The change has been highlighted in the manuscript. Figure S2 is now moved and renamed  
431 to Figure S3 on page 5 of the Supplementary material.

432 6. *In Figure S3E, the scale bar is missing.*

433 A scale bar has been added to figure S3E. The figure has now been moved and renamed  
434 to Figure S4E on page 7 of the Supplementary material.

435 7. *In Figures 3A and S4A, the length of a scale bar is not provided in the legends.*

436 The length of the scale bars in Figures 3A on page 16 and S4A has been added to the  
437 legend and highlighted. Figure S4A is now moved and renamed to S5A on page 8 of the  
438 Supplementary material.

439 8. *In Figure S5, “(B)” is missing in the legend.*

440 The figure legend in Figure S5 has been changed according to changes in the figure. The  
441 figure is now renamed to Figure S7 on pages 10-11 of the Supplementary material.

442 9. *p. 29. The reference “Farias, 2019” is not formatted properly.*

443 We have now shortened our Discussion as per Reviewer #2 request, so this part of the  
444 text is no longer included in the manuscript.

445

446

447

448

449 Reviewer #2 (Remarks to the Author):

450 *Petrova and colleagues have performed a series of experiments investigating the efficacy of*  
451 *Protrudin in promoting axon regeneration after CNS injury. Protrudin was found to be*  
452 *excluded from cortical axons as they mature into neuronal circuits in a time frame coinciding*  
453 *with their transition to an inability to regenerate. Overexpressing wildtype protrudin or a*  
454 *phosphomimetic active form of protein promoted axon regeneration in an in vitro laser*  
455 *axotomy assay and enhanced cortical axon outgrowth in vitro. Interestingly, protrudin*  
456 *overexpression enhanced accumulation of endoplasmic reticulum, integrins, and Rab11*  
457 *endosomes into the distal axon, and importantly, removing Protrudin's endoplasmic reticulum*  
458 *localization, kinesin-binding, or phosphoinositide-binding properties abrogated its*  
459 *regenerative effects. Finally, overexpression of wildtype or active protruding prevented RGC*  
460 *death in a glaucoma explant model and axon regeneration after optic nerve injury in vivo.*

461

462 *The Fawcett lab has made substantial contributions in the field of axon regeneration, by*  
463 *combining state-of-the-art cell biological techniques and questions with the injured spinal*  
464 *cord. The presented work is another brilliant example of this approach. This study unravels*  
465 *the endoplasmic reticulum as a new player driving axon regeneration. The experiments provide*  
466 *a novel understanding of how the scaffolding of axonal organelles and motors into the growth*  
467 *cone is important for regenerative outcome. The manuscript is of high technical quality and*  
468 *very interesting for the general readership of Nature Communications. There are few*  
469 *comments that should be worked on.*

470

471 **MAJOR**

472

473 *1. The laser axotomy assay demonstrates that overexpression of wildtype protrudig or active*  
474 *protrudin enhances axon regeneration in mature neurons. Is there a specific time-frame post-*  
475 *axotomy in which Protrudin enhances outgrowth? Does it enhance initial growth cone*  
476 *formation or growth after growth cone formation has already occurred? The authors should*  
477 *compare the kinetics of axon growth in regenerating axons between the different groups and*  
478 *assess this with their existing data.*

479

480 The reviewer has a very interesting suggestion. The question is partly answered in Figure 2F-  
481 G in the original paper. These analyses show that expression of Protrudin, particularly the  
482 phosphomimetic form, speeds the formation of a new growth cone and increases the distance  
483 over which axons regenerate. To address this question, we used our laser *in vitro* axotomy data  
484 and performed further analysis where we compared the kinetics of axon regeneration. We  
485 calculated kinetics by dividing the distance regenerated by each axon by the time it took to  
486 extend (measuring from the start of axon extension) in order to obtain the speed of axon  
487 regeneration. We did not observe any differences in the speed of regeneration between the  
488 different conditions (Fig. 2H in revised manuscript, and associated text is on page 10). These  
489 results taken together with the finding that axons overexpressing either wild-type or active  
490 Protrudin start regenerating faster than control axons (Fig. 2G in revised manuscript, and text  
491 on page 10), allow us to propose that Protrudin mainly affects the initial decision of whether  
492 an axon will regenerate or not (i.e. the process of growth cone formation) rather the speed of  
493 axon elongation once growth cones are formed. We have added the text “The speed of axon  
494 extension after growth cone initiation did not differ between the three conditions (**Fig. 2H**).  
495 This indicates that Protrudin has its most pronounced effect on initial growth cone formation,  
496 rather than on the axon elongation phase of regeneration” on page 10.

497

498 *2. The effect of Protrudin overexpression on neuroprotection in the glaucoma model presented*  
499 *in Figure 6 is very exciting. It would be of significant interest to the community to assess*  
500 *whether Protrudin overexpression can also prevent cell loss after axotomy in vivo. Conversely,*  
501 *it would be interesting to know if Protrudin overexpression prevents neurodegeneration in the*  
502 *explant model but not in the in vivo situation, and if this were the case, it would not change the*  
503 *importance of this paper. Given the experiments performed in Figure 5, the authors should*  
504 *perform retinal whole-mount staining or stain tissue sections of the retina and quantify the*  
505 *extent of retinal ganglion cell loss 2 weeks after optic-nerve crush after overexpression of the*  
506 *wildtype protrudin and active protrudin constructs relative to control.*

507 *The reviewer is aware of the current Covid-situation. In case this is the only hurdle preventing*  
508 *rapid publication, the reviewer can be convinced that this should not be done. If, however,*  
509 *other reviewers ask for experimental additions, preventing a rapid turnaround, we would like*  
510 *to kindly ask that this experiment will be performed.*

511 We thank the reviewer for this suggestion, and we agree that it is of great importance to show  
512 whether Protrudin provides neuroprotection at a longer time point after optic nerve injury, and  
513 this study was under way at the time of submission. The results are now in place and show  
514 robust neuroprotection particularly by phosphomimetic Protrudin.

515 We performed optic nerve crush as described in the manuscript on page 22 and calculated the  
516 survival rate of retinal ganglion cells as identified by RBPMS staining 2 weeks post injury. We  
517 found that active Protrudin increased the proportion of surviving retinal ganglion cells (52%)  
518 compared to either wild-type Protrudin (27%) or GFP control (28%). These results suggest that  
519 active Protrudin has a long-lasting effect on neuroprotection. This data is now presented in Fig.  
520 5C and D and the associated text is on page 22 in the revised manuscript.

521 MINOR

522 - *In introduction – “leading to better regenerative after injury” should be “better*  
523 *regeneration”*

524

525 The change was highlighted in the text on page 3.

526

527 - *Later in introduction – “Interfering with other key domains of also eliminated the*  
528 *regenerative effects.” – missing Protrudin?*

529

530 The change was highlighted in the text on page 4.

531

532 - *The figure legend for Figure 1 is missing “G”. It is not clear at what timepoint DIV the*  
533 *analysis of the overexpressed Protrudin is done at.*

534

535 A legend for figure 1G has been added on page 8. The timepoint at which the axon-to-  
536 dendrite ration for overexpressed Protrudin was measured was added both in the figure  
537 legend on page 8 as well as in the text on page 6. All changes have been highlighted in  
538 the manuscript.

539

540 - *The discussion is quite long and should be re-written to be more concise.*

541 This point has been addressed in the manuscript and the discussion was shortened.



542 Reviewer #3 (Remarks to the Author):

543 Comments to Authors:

544

545 *In this study, Petrova and colleagues have utilized imaging techniques to study effects of*  
546 *overexpression of the ER protein protrudin in axonal regeneration. The main finding from the*  
547 *work is that protrudin, especially in its phosphorylated form, is able to promote axon*  
548 *regeneration and it requires all of its membrane targeting and protein binding domains to be*  
549 *able to perform this function, suggesting that this process requires the scaffolding of kinesin,*  
550 *Rab11 vesicles and the endoplasmic reticulum (ER). Similar findings have been reported for a*  
551 *role of protrudin in neurite outgrowth, but this manuscript is the first report in the context of*  
552 *axonal regeneration. Increasing the flux of Rab11 vesicles in axons has been previously shown*  
553 *to promote axonal regeneration, so given that the authors show that protrudin overexpression*  
554 *promotes Rab11 vesicle trafficking in axons, it is expected that protrudin would be able to*  
555 *promote axonal regeneration as well. The most original finding from this manuscript is the*  
556 *requirement of the ER localization of protrudin in the process. This result will open new*  
557 *questions regarding the role of the ER in axonal regeneration. A main limitation of this study*  
558 *is that it is not clear how the various interactions of protrudin are functionally interconnected.*  
559 *This limitation limit the conceptual advance contributed by this manuscript relative to previous*  
560 *knowledge.*

561

562 *Specific comments:*

563 *- In several experiments, a phosphomimetic form of protrudin is used. The study cited*  
564 *regarding this construct (Shirane et al 2006) finds that protrudin gets phosphorylated upon*  
565 *ERK activation, that protrudin binds better to Rab11 upon ERK activation, and identifies*  
566 *potential ERK phosphorylation sites in protrudin. However, this study does not directly test*  
567 *whether phosphomimetic mutants of protrudin indeed recruit more Rab11 than WT forms of*  
568 *the protein. The authors should analyse whether in fact there is more Rab11 bound to the active*  
569 *form of protrudin when compared to WT, and whether other properties of Protrudin (such as*  
570 *kinesin binding or VAP binding) are affected in this mutant.*

571

572 We thank the reviewer for this comment, which is similar to point 1 raised by reviewer #1. As  
573 described in our response to reviewer #1, we tested whether there is stronger binding of active  
574 Protrudin to Rab11, by co-overexpressing different forms of Rab11 – wild-type, dominant  
575 negative or constitutively active and performing co-immunoprecipitation assays with either  
576 wild-type or active Protrudin. The results of those experiments are described in detail in  
577 response to Reviewer 1, comment 1, and in figure R1, but briefly, we did not find a significant  
578 difference in binding of active Protrudin to Rab11 compared with wild-type Protrudin.

579 To further address the points raised here, we performed multiple immunoprecipitation assays  
580 where we overexpressed either GFP control, wild-type GFP-Protrudin or active GFP-Protrudin  
581 and analysed endogenous protein interactions. After immuno-isolation using anti-GFP  
582 microbeads, we performed immunoblotting for either Rab11, VAP-A or KIF5A.  
583 Unfortunately, in these experiments we could not detect sufficient endogenous Rab11 or KIF5  
584 after immunoprecipitation. We did however find that active Protrudin bound more strongly to  
585 VAP-A compared to wild-type Protrudin and control GFP (Fig. R3 below). These results  
586 suggest that one way in which active Protrudin leads to stronger actions on regeneration and  
587 neuroprotection compared to wild-type Protrudin could be a more robust interaction with ER  
588 contact site proteins. and is in keeping with our findings in Fig. 4. We have added new text to  
589 include this on page 18 in the conclusions to Fig. 4. “These findings indicate that  
590 phosphomimetic, active protrudin has stronger effects on ER mobilization compared with wild-  
591 type protrudin, in contrast to its effects on Rab11 transport (Fig. 3).” Whilst our finding  
592 regarding VAP-A is keeping with our other findings, we have chosen not to include this in the  
593 manuscript because our experiments looking at endogenous Rab11 and kinesin were  
594 inconclusive.

595 Overall, the data in the manuscript, combined with our findings from Rab11 and VAP-A  
596 pulldowns suggest that the active Protrudin construct we have generated functions to enhance  
597 regeneration mostly through ER mediated effects. Wild-type Protrudin modestly enhances  
598 axonal ER, whilst active Protrudin does this robustly. Our pulldown data suggest that this is  
599 mediated by an increased binding to VAP proteins (which occurs at ER contact sites), rather  
600 than increased binding to Rab11.

601 To convey this in the manuscript, we have added two new sections of text. In response to the  
602 similar point raised by reviewer one we have added new text on pages 13 and 14 that reads:  
603 “The finding that active Protrudin has no additional effect on axonal transport compared with

604 wild-type Protrudin suggests that phosphomimetic Protrudin does not function to further  
605 stimulate Rab11 transport”. As mentioned above, we have added new text on page 18: “These  
606 findings indicate that phosphomimetic, active Protrudin has stronger effects on ER  
607 mobilization compared with wild-type Protrudin, in contrast to its effects on Rab11 transport  
608 (Fig. 3).”

609

610

611

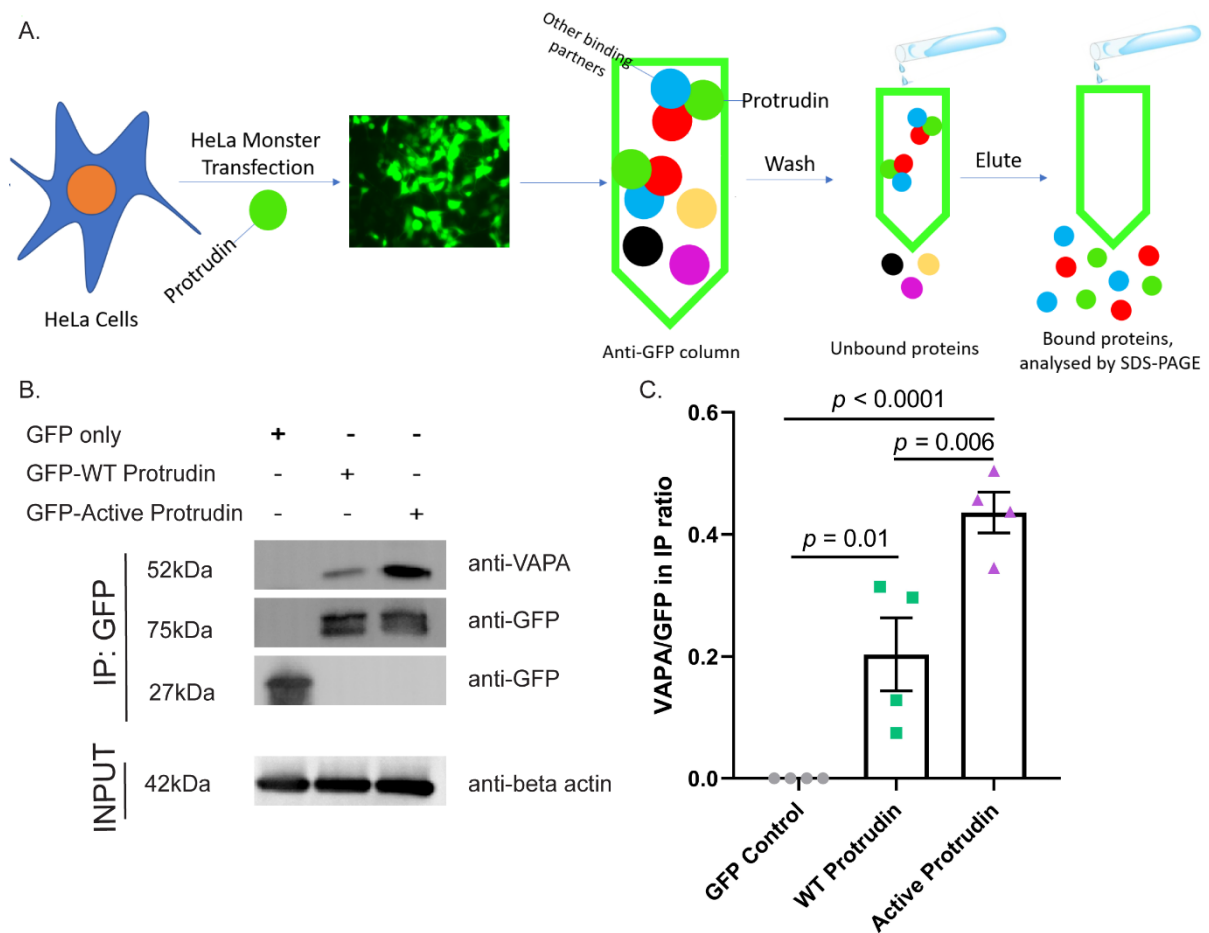

612

613 **Fig. R3. Immunoprecipitation of VAPA after Protrudin overexpression in HeLa cells.**  
 614 Schematic diagram to describe the immunoprecipitation methodology. B. Immunoblots from  
 615 IP and input to show that active Protrudin binds more strongly to VAPA than wild type  
 616 Protrudin. C. Quantification of the band density of VAPA in IP after immunoblotting with anti-  
 617 VAPA antibody from several different experiments ( $n = 4$ ), normalised to the amount of GFP  
 618 overexpression (*one-way ANOVA*,  $p = 0.0001$ ).

619

620

621

622

623

624 - It was shown previously that overexpression of Rab11 promotes axonal regeneration by  
625 increasing Rab11 trafficking into the axon, and the present manuscript shows that protrudin  
626 overexpression increases Rab11 trafficking in the axon. However, the authors here report that  
627 the ER connection of protrudin is also crucial for axonal regeneration, suggesting its role in  
628 tethering Rab11 to KIF5A is not enough to achieve a considerable effect in this process. Could  
629 these effects be intertwined? Is Rab11 trafficking into the axon affected by overexpression of  
630 the ER-localization defective mutants?

631 The reviewer raises some very relevant points regarding the relationship between  
632 Rab11 transport and the ER. We intended to address this as suggested, examining Rab11 axon  
633 transport in the presence of the ER localization mutants, however we have been unable to  
634 perform these experiments due to the continued difficulty in obtaining rat embryos from our  
635 animal facilities since the UK lockdown and continued restrictions. One issue is that our newly  
636 built animal facility was re-allocated as a regional coronavirus testing centre. We had a limited  
637 number of fixed cortical neurons expressing ER mutants that we have labelled for endogenous  
638 Rab11, but we have not seen any differences in Rab11 axonal localisation in these neurons.  
639 The data we have presented in Fig. 3 and 4 confirm the importance of both Rab11 and ER for  
640 the regenerative effects, but we agree that we have not been able to determine which organelle  
641 is the most important. Our *in vivo* findings confirm that active Protrudin has the most robust  
642 effects on regeneration and neuroprotection, whilst our *in vitro* experiments suggest that  
643 increased ER mobilisation is responsible for these effects, rather than enhanced Rab11 binding.  
644 We have recently acquired funding to address the role of the ER in CNS axon regeneration,  
645 and will be investigating whether we can stimulate regeneration with other ER mobilising  
646 strategies that function independently of a direct Rab11 interaction. It is however likely that  
647 the ER and recycling/Rab11 endosomes are intertwined, in that increased ER may serve as a  
648 platform for increased endosomal transport, by virtue of an increase in ER-endosome contact  
649 sites. Alternatively, it may also be possible to increase ER by increasing endosome transport,  
650 with ER being dragged by endosomes on motors at contact sites. In future, we will also be  
651 investigating whether interventions that increase Rab11 axonal transport (such as EFA6  
652 deletion) and regeneration also lead to increased ER within the axon. We are also continuing  
653 to investigate whether our other Rab11-mobilising interventions promote regeneration in either  
654 the spinal cord or optic nerve. This work is making good progress, but is not ready for  
655 publication.

656 To address this in the manuscript, we have added some text to the discussion on page 32: “An  
657 outstanding issue is the relative contribution of the ER and Rab11 to the regenerative effects  
658 of protrudin and active protrudin, especially because the ER is closely linked to numerous types  
659 of endosomes through interactions at contact sites. Further work is needed to determine if  
660 additional interventions which increase axonal ER also lead to enhanced regeneration,  
661 independently of a direct interaction with Rab11.”

662

663 - *In Fig 4E, the graph suggests that both protrudin mutants defective in ER binding (the*  
664 *construct lacking the motif FFAT and the construct lacking TM domains) are not as powerful*  
665 *in promoting axon regeneration as the active form of protrudin, although these mutants have*  
666 *some effect relative to the control. Given that these mutants can still bind kinesin and Rab11,*  
667 *one wonders whether the effect of protrudin in axonal regeneration is the result of these effects,*  
668 *independently, the ER into the growing axon. Would it be possible to promote the regeneration*  
669 *of axons with co-expression of a protrudin construct that can bind VAP and KIF5A but not and*  
670 *a protrudin construct that can bind Rab11 and KIF5a but not VAP? In other words, is it strictly*  
671 *necessary to have a scaffold of the 3 components (ER, Rab11 and kinesin) or is protrudin*  
672 *performing two separate jobs by separately linking the ER to kinesin and Rab11 to kinesin?*

673 This point is similar to the previous one, in that it would be good to be able to tease out the  
674 contributions of Rab11 and ER to regeneration, and the Rab11 deletion mutant would have  
675 been ideal for determining the extent of the three components functioning as a scaffold.  
676 Frustratingly this construct proved to be toxic in cortical neurons. We tried to dilute the toxicity  
677 by transfecting at low levels, and whilst we had some surviving neurons, there were not enough  
678 for reproducible experiments. The toxicity suggests that the Rab11-Protrudin interaction is  
679 essential for cell viability, and it will be important to determine why, as this may contribute to  
680 the neuroprotective effect we observed. In an attempt to overcome this issue, we have begun  
681 working with an inducible neuronal cell line in addition to cortical neurons, but this work is at  
682 a very early stage, and has been hampered by the pandemic and UK lockdown. The reviewer  
683 makes an important point, that the ER localisation mutants have some regenerative effects  
684 relative to the control, and so we have added to the text on page 18 “However, both deletion  
685 mutants had moderate regenerative effects compared to the controls. Whilst these were not  
686 statistically significant, they indicate that Protrudin may exert some effects independently of  
687 its localization to ER contact sites.”

688 *Minor comments:*

689 - *Some measurements of mRNA in Fig1D do not have error bars. These are necessary to*  
690 *support the claim that protrudin expression is increased upon injury.*

691 We thank the reviewer for this comment. We have now added sample sizes for all graphs in  
692 Figure 1D which have been highlighted in the figure legend on page 8. Each data point consists  
693 of at least three different values – however the changes amongst these values are very small  
694 and when compared to the scale of the whole graph, they seem to be negligible and cannot be  
695 displayed on the graph as the error bars are too small to be visible. For example, the values for  
696 Cacna2d2 mRNA in cultured DRG neurons are  $215 \pm 18$  (6 hours post plating),  $120 \pm 26$  (12  
697 hours post plating),  $68 \pm 9$  (24 hours post plating) and  $64 \pm 20$  (36 hours post plating)  
698 normalised expression values but the range for the Y-axis is between 0-2000 . We can provide  
699 a full table with the data for each data point if necessary. We consulted the GraphPad Prism  
700 FAQ page and tried to circumvent the problem by using their three advised methods to do so,  
701 but we could not achieve a better presentation of the data.

702

703 **References**

- 704 1. Chen, Z. & Cole, P. A. Synthetic approaches to protein phosphorylation. *Current*  
705 *Opinion in Chemical Biology* vol. 28 115–122 (2015).
- 706 2. Shirane, M. & Nakayama, K. I. Protrudin Induces Neurite Formation by Directional  
707 Membrane Trafficking. *Science (80-. )*. **314**, 818–821 (2006).
- 708 3. Matsuzaki, F., Shirane, M., Matsumoto, M. & Nakayama, K. I. Protrudin serves as an  
709 adaptor molecule that connects KIF5 and its cargoes in vesicular transport during  
710 process formation. *Mol. Biol. Cell* **22**, 4602–20 (2011).
- 711 4. Chang, J., Lee, S. & Blackstone, C. Protrudin binds atlastins and endoplasmic  
712 reticulum-shaping proteins and regulates network formation. *Proc. Natl. Acad. Sci.*  
713 **110**, 14954–14959 (2013).
- 714 5. Hong, Z. *et al.* PtdIns3P controls mTORC1 signaling through lysosomal positioning. *J*  
715 *Cell Biol* **216**, 4217–4233 (2017).
- 716 6. Connell, J. W. *et al.* ESCRT-III-associated proteins and spastin inhibit protrudin-  
717 dependent polarised membrane traffic. *Cell. Mol. Life Sci.* (2019) doi:10.1007/s00018-  
718 019-03313-z.
- 719 7. Zhang, C. *et al.* Role of spastin and protrudin in neurite outgrowth. *J. Cell. Biochem.*  
720 **113**, 2296–2307 (2012).
- 721 8. Pernet, V. *et al.* Neuronal Nogo-A upregulation does not contribute to ER stress-  
722 associated apoptosis but participates in the regenerative response in the axotomized  
723 adult retina. *Cell Death Differ.* **19**, 1096–1108 (2012).
- 724 9. Welte, C., Engel, S. & Stuermer, C. A. O. Upregulation of the zebrafish Nogo-A  
725 homologue, Rtn4b, in retinal ganglion cells is functionally involved in axon  
726 regeneration. *Neural Dev.* **10**, 6 (2015).
- 727 10. Hunt, D., Coffin, R. S., Prinjha, R. K., Campbell, G. & Anderson, P. N. Nogo-A  
728 expression in the intact and injured nervous system. *Mol. Cell. Neurosci.* **24**, 1083–  
729 1102 (2003).



- 730 11. Rämö, O. *et al.* NOGO-A/RTN4A and NOGO-B/RTN4B are simultaneously  
731 expressed in epithelial, fibroblast and neuronal cells and maintain ER morphology. *Sci.*  
732 *Rep.* **6**, 1–14 (2016).
- 733 12. Voeltz, G. K., Prinz, W. A., Shibata, Y., Rist, J. M. & Rapoport, T. A. A class of  
734 membrane proteins shaping the tubular endoplasmic reticulum. *Cell* **124**, 573–586  
735 (2006).
- 736 13. Fariás, G. G. *et al.* Feedback-Driven Mechanisms between Microtubules and the  
737 Endoplasmic Reticulum Instruct Neuronal Polarity. *Neuron* (2019)  
738 doi:10.1016/j.neuron.2019.01.030.
- 739 14. Pattamatta, U., McPherson, Z. & White, A. A mouse retinal explant model for use in  
740 studying neuroprotection in glaucoma. *Exp. Eye Res.* **151**, 38–44 (2016).
- 741 15. Tedeschi, A. *et al.* The Calcium Channel Subunit Alpha2delta2 Suppresses Axon  
742 Regeneration in the Adult CNS. *Neuron* **92**, 419–434 (2016).
- 743 16. Barry, A. M., Sondermann, J. R., Sondermann, J. H., Gomez-Varela, D. & Schmidt,  
744 M. Region-Resolved Quantitative Proteome Profiling Reveals Molecular Dynamics  
745 Associated With Chronic Pain in the PNS and Spinal Cord. *Front. Mol. Neurosci.* **11**,  
746 259 (2018).
- 747

## REVIEWERS' COMMENTS

### Reviewer #1 (Remarks to the Author):

I went through the rebuttal letter and the crucial figures of the revised version. In the revised paper, the authors experimentally addressed most of my questions and the results came out clean. While it is somewhat disappointing that some key experiments were not conducted for the coronavirus pandemic, I can understand the circumstances surrounding the authors. I strongly suggest to the authors that the term "active" Protrudin should be replaced with "phosphomimetic" Protrudin to avoid confusion and misunderstanding of the readers. As for the other points, the revision has been done very well and I have no further points.

### Reviewer #2 (Remarks to the Author):

The authors have done an outstanding job of responding to our suggestions and have supplied additional, convincing data. The manuscript is suitable for publication.

### Reviewer #3 (Remarks to the Author):

The authors have addressed my concerns

Reviewer #1 (Remarks to the Author):

*I went through the rebuttal letter and the crucial figures of the revised version. In the revised paper, the authors experimentally addressed most of my questions and the results came out clean. While it is somewhat disappointing that some key experiments were not conducted for the coronavirus pandemic, I can understand the circumstances surrounding the authors. I strongly suggest to the authors that the term "active" Protrudin should be replaced with "phosphomimetic" Protrudin to avoid confusion and misunderstanding of the readers. As for the other points, the revision has been done very well and I have no further points.*

We thank the reviewer for their suggestion, and we have now changed the name of "active" Protrudin to "phosphomimetic" Protrudin throughout the text and in all display items of our manuscript.

Reviewer #2 (Remarks to the Author):

*The authors have done an outstanding job of responding to our suggestions and have supplied additional, convincing data. The manuscript is suitable for publication.*

Reviewer #3 (Remarks to the Author):

*The authors have addressed my concerns.*
