# Supplementary material for: Protrudin functions from the endoplasmic reticulum to support axon regeneration in the adult CNS
Source: PubMed Central journal article supplement (PMC7645621; doi:10.1038/s41467-020-19436-y), 2020-11-05
Supplement: 41467_2020_19436_MOESM3_ESM.pdf [file 41467_2020_19436_MOESM3_ESM.pdf]

## Description of Additional Supplementary Files

**Supplementary Movie 1.** Example videos showing a non-regenerating axon expressing mCherry control plasmid and regenerating axons expressing either wild-type or phosphomimetic Protrudin after laser axotomy over a 14-hour period of imaging.
